# Supplementary material
Source: publisher figshare collection journal article supplement (https://brill.figshare.com/ndownloader/files/35024455)
Supplement: Supplementary file 1 [file 35024455]

>NKZ232_COI
TGACTTCTACCACTTATATTAGGTTCACCTGATATAAGTTTTCCACGTTTAAATAATATT
AGGTTTTGGTTATTACCTGTGTCTTTAATATTATTATTTTTAGCTTGTTTTGTTGGTTTA
GGAGCTGGGACAAGATGGACTGTTTATCCTCCTTTGAGTACTTTAGGGCACCCTGGGGAA
AGAGTAGATTTAGCAATTTTTAGTCTTCATTGTGCTGGTGTTAGATCTATTTTAGGTGGA
ATTAATTTTATATGTACTACAAAAAATTTACGTAGTAGTTCTATTTCTTTAGAACACATA
GGTTTATTTGTTTGAACAATTTTTGTTACAGTTTTTTTGTTAGTTTTATCTTTACCTGTT
TTAGCTGGAGCTATTACTATATTATTAACTGATCGTAATATTAATACTTCTTTTTTTGAT
CCTAGAATAGGGGGTAACCCTTTAATTTATCAGCATTTATTTTGATTTTTTGGGCATCCT
GAGGTTTATATTTTAATTTTACCTGCTTTTGGTATTATAAGGCATAGAATTTTATTTATT
ACTGGTAAAAAAGAAGTATTTGGTTCTTTAGGTATAGTTTACGCTATTTTAAGTATTGGT
TTAATTGGTTGTGTAGTTTGAGCTCATCATATATACACTGTAGGGATAGATTTAGATTCT

>NKZ280_COI
TGACTTTTACCACTTATATTAGGTTCACCTGATATAAGTTTTCCACGTTTAAATAATATT
AGATTTTGATTGTTACCTGTTTCTTTAATGTTATTATTTTTAGCTTGTTTTGTTGGTCTA
GGAGCTGGTACAAGATGAACTGTTTACCCTCCTTTAAGTACTTTAGGTCATCCTGGAGAA
AGAGTAGATTTAGCAATTTTTAGTCTTCATTGTGCTGGTGTAAGTTCTATTTTGGGGGGT
ATTAATTTTATATGCACTACAAAAAATTTACGTAGAAGTTCTATTTCTTTAGAACATATA
GGTTTATTTGTATGAACAATTTTTGTTACAGTTTTTTTATTGGTTTTATCTTTACCAGTT
TTAGCTGGAGCTATCACAATATTACTAACTGATCGTAATATTAATACTTCTTTTTTTGAC
CCTAGGATAGGTGGGAACCCTTTAATTTATCAACATTTGTTTTGATTTTTTGGGCATCCT
GAAGTTTATATTTTAATTTTGCCAGCTTTCGGTATTATTAGGCATAGAATTTTATTTATT
ACTGGTAAAAAAGAAGTATTTGGTTCTTTAGGGATAGTTTATGCTATTTTGAGTATTGGT
TTAATTGGTTGTGTAGTTTGGGCTCATCATATATATACTGTAGGGATGGATTTAGATTCT

>NKZ281_COI
TGACTTTTACCACTTATATTAGGTTCACCTGATATAAGTTTTCCACGTTTAAATAATATT
AGATTTTGATTATTACCTGTTTCTTTAATGTTATTATTTTTAGCTTGTTTTGTAGGGTTA
GGAGCTGGGACAAGGTGAACTGTTTATCCTCCTTTAAGTACTTTGGGTCATCCTGGAGAA
AGAGTAGATTTAGCAATTTTTAGTCTTCATTGTGCTGGTGTAAGTTCTATTTTGGGTGGT
ATTAATTTTATATGTACTACAAAAAATTTACGTAGAAGTTCTATTTCTTTAGAACATATA
GGTTTATTTGTATGAACAATTTTTGTTACAGTTTTTTTGTTAGTTTTATCTTTACCAGTT
TTAGCTGGAGCAATTACAATATTATTAACTGACCGTAATATTAATACTTCTTTTTTTGAC
CCTAGAATAGGTGGGAACCCTTTAATTTATCAACATTTATTTTGATTTTTTGGGCACCCT
GAAGTTTATATTTTAATTTTACCAGCTTTTGGTATTATTAGGCACAGAATTTTATTTATT
ACTGGTAAAAAAGAAGTATTTGGTTCTTTAGGTATGGTTTATGCTATTCTAAGTATTGGT
TTAATTGGTTGTGTAGTTTGAGCTCATCATATATATACTGTAGGTATAGATTTAGATTCT
